# Supplementary material
Source: HighWire-hosted journal article supplement (https://www.cmajopen.ca/highwire/filestream/81274/field_highwire_adjunct_files/1/2019-0129-2-at.pdf)
Supplement: 2019-0129-2-at.pdf [file 2019-0129-2-at.pdf]

## Appendix 2 (as supplied by the authors): Characteristics of awards issued by provincial housestaff organizations and Resident Doctors of Canada

| Award                                                                                        | Award Winner       | Award Criteria                                                                                                                                                                                                                                                                                                                                                                                                                                                                                                                                                                                               | Award Classification                 | Nominations                                                                     | Data Extraction Source                   |
|----------------------------------------------------------------------------------------------|--------------------|--------------------------------------------------------------------------------------------------------------------------------------------------------------------------------------------------------------------------------------------------------------------------------------------------------------------------------------------------------------------------------------------------------------------------------------------------------------------------------------------------------------------------------------------------------------------------------------------------------------|--------------------------------------|---------------------------------------------------------------------------------|------------------------------------------|
| Resident Doctors of Canada Puddester Award for Resident Wellness                             | Staff and Resident | Demonstrate a firm commitment to resident wellness through specific actions and initiatives; exemplify creativity and leadership in taking action to improve and promote resident wellness; bring about change that has the potential to result in positive, long term improvement to resident wellness in Canada                                                                                                                                                                                                                                                                                            | Professionalism, advocacy & wellness | May self-nominate; does not explicitly say so on website                        | Public; gender confirmed by organization |
| Resident Doctors of Canada Mikhael Award for Medical Education                               | Staff and Resident | Demonstrate a firm commitment to medical education through specific actions and initiatives; exemplify creativity and leadership in taking action to improve and promote medical education; bring about change that has the potential to result in positive, long term improvement to medical education in Canada.                                                                                                                                                                                                                                                                                           | Education and teaching               | May self-nominate; does not explicitly say so on website                        | Public; gender confirmed by organization |
| Resident Doctors of British Columbia Award of Excellence (Merit)                             | Resident           | Shows outstanding initiative in one of: Resident health and well-being, promotion of the role of residents in the health care system, advocacy and representation of residents leading to improved work or learning environments                                                                                                                                                                                                                                                                                                                                                                             | Professionalism, advocacy & wellness | Two nominators, one of which may be self. Does not explicitly say so on website | Public                                   |
| Resident Doctors of British Columbia Award of Excellence (Resident's Advocate)               | Staff              | Significant interest in issues of importance to Residents. Advocates for the personal professional or educational advancement of residents.                                                                                                                                                                                                                                                                                                                                                                                                                                                                  | Professionalism, advocacy & wellness | Nominated by residents                                                          | Public                                   |
| Resident Doctors of British Columbia Award of Excellence (Teaching)                          | Staff              | Contributions to residents' medical education. Created a safe learning environment that encourages self-inquiry, supports adult learning, and fosters within learners a desire to achieve their highest potential. Shown outstanding initiative in the following areas: Bedside teaching, didactic teaching, assessment                                                                                                                                                                                                                                                                                      | Education and teaching               | Nominated by residents                                                          | Public                                   |
| Professional Association of Residents of Alberta Clinical Teaching                           | Staff              | Shown excellence in resident physician education. One award given to a preceptor based in Calgary, Edmonton, and a rural site.                                                                                                                                                                                                                                                                                                                                                                                                                                                                               | Education and teaching               | May self-nominate; does not explicitly say so on website                        | Part public, part requested data         |
| Professional Association of Residents of Alberta Well-being                                  | Staff              | Outstanding contributions made in physician wellness by a physician based in Calgary, Edmonton, and a rural site.                                                                                                                                                                                                                                                                                                                                                                                                                                                                                            | Professionalism, advocacy & wellness | May self-nominate; does not explicitly say so on website                        | Part public, part requested data         |
| Resident Doctors of Saskatchewan Excellence in Teaching Awards                               | Staff              | Individuals who have demonstrated exceptional skill in delivering resident education. Criteria: quality of teaching; positive role modelling; rapport with residents; overall enthusiasm and commitment.                                                                                                                                                                                                                                                                                                                                                                                                     | Education and teaching               | Not open to self-nomination                                                     | Requested; gender provided, not names    |
| Resident Doctors of Saskatchewan The Dr. Brad Ardell Spirit Award                            | Resident           | The award recognizes residents who possess the same "true prairie spirit" as Dr. Ardell, a hard-working, compassionate and selfless individual.                                                                                                                                                                                                                                                                                                                                                                                                                                                              | Professionalism, advocacy & wellness | Not open to self-nomination                                                     | Requested; gender provided, not names    |
| Professional Association of Residents and Interns of Manitoba Resident Mentorship Award      | Resident           | Genuine interest and investment in mentees; support of professional growth of mentees; support of personal growth and wellbeing of mentees; positive role model in professionalism, career, education, and behaviours; provides supportive atmosphere with respect for confidentiality; encouragement of mentees in goal development and motivation for achievement; provision of honest and constructive feedback                                                                                                                                                                                           | Not classified                       | Not open to self-nomination                                                     | Public                                   |
| Professional Association of Residents and Interns of Manitoba Resident Professionalism Award | Resident           | Adherence to ethical, moral, and legal principles of medicine; compassion and caring for others with appreciation of social determinants of health; respect for all patients, colleagues, co-workers, and trainees; honesty and integrity in all aspects of work and education; adherence to professional standards; commitment to their professional development and excellence; prioritization of patient safety; strong appreciation the importance of confidentiality; appreciation for professional boundaries; attendance to potential conflicts of interest; understanding of own wellness and limits | Professionalism, advocacy & wellness | Not open to self-nomination                                                     | Public                                   |

|                                                                                             |                                        |                                                                                                                                                                                                                                                                                                                                                                                                                                                                                                                                                                                                                                                                                                                                                                 |                                      |                                       |                                  |
|---------------------------------------------------------------------------------------------|----------------------------------------|-----------------------------------------------------------------------------------------------------------------------------------------------------------------------------------------------------------------------------------------------------------------------------------------------------------------------------------------------------------------------------------------------------------------------------------------------------------------------------------------------------------------------------------------------------------------------------------------------------------------------------------------------------------------------------------------------------------------------------------------------------------------|--------------------------------------|---------------------------------------|----------------------------------|
| Professional Association of Residents and Interns of Manitoba Resident Teaching Award       | Resident                               | Commitment to the evaluation process: accessibility and value of constructive feedback; demonstration of Clinical Expertise and Evidence based approach to resident and medical student education; embodiment and integration of the CanMEDS roles; strong record of integrating ethics and professionalism to education; evidence of effective leadership and mentorship ability                                                                                                                                                                                                                                                                                                                                                                               | Education and teaching               | Not open to self-nomination           | Public                           |
| Professional Association of Residents and Interns of Manitoba Staff Mentorship Award        | Staff                                  | Genuine interest and investment in mentees; support of professional growth of mentees; support of personal growth and wellbeing of mentees; positive role model in professionalism, career, education, and behaviours; provides supportive atmosphere with respect for confidentiality; encouragement of mentees in goal development and motivation for achievement; provision of honest and constructive feedback                                                                                                                                                                                                                                                                                                                                              | Not classified                       | Nominated by residents                | Public                           |
| Professional Association of Residents and Interns of Manitoba Educator of the Year, Offsite | Staff                                  | Physicians based outside of the two main teaching hospitals in Winnipeg; working in community hospitals, community practice, rural and remote areas. Commitment to the evaluation process: accessibility and value of constructive feedback; demonstrates clinical expertise and evidence-based approach to resident education; embodies or integrates the CanMEDS roles; strong record of integrating ethics and professionalism to residency education; evidence of effective leadership and mentorship ability.                                                                                                                                                                                                                                              | Education and teaching               | Nominated by residents                | Public                           |
| Professional Association of Residents and Interns of Manitoba Educator of the Year, Onsite  | Staff                                  | Physicians based in the two main teaching hospitals in Winnipeg. Commitment to the evaluation process: accessibility and value of constructive feedback; demonstrates clinical expertise and evidence based approach to resident education; embodies or integrates the CanMEDS Roles; strong record of integrating ethics and professionalism to residency education; evidence of effective leadership and mentorship ability.                                                                                                                                                                                                                                                                                                                                  | Education and teaching               | Nominated by residents                | Public                           |
| Professional Association of Residents and Interns of Manitoba Educator of the Year          | Staff                                  | Commitment to the evaluation process: accessibility and value of constructive feedback; demonstrates clinical expertise and evidence based approach to resident education; embodies or integrates the CanMEDS Roles; strong record of integrating ethics and professionalism to residency education; evidence of effective leadership and mentorship ability.                                                                                                                                                                                                                                                                                                                                                                                                   | Education and teaching               | Nominated by residents                | Public                           |
| Professional Association of Residents and Interns of Manitoba Resident of the Year          | Resident                               | Criteria not available.                                                                                                                                                                                                                                                                                                                                                                                                                                                                                                                                                                                                                                                                                                                                         | Not classified.                      | Not open to self-nomination           | Public                           |
| Professional Association of Residents of Ontario Clinical Teaching                          | Staff                                  | Two awards for University of Toronto (due to size) and one for each of the other five Ontario medical schools. Involved in full or part-time clinical teaching of residents. Criteria: passion for teaching; delivers clear, relevant information; quality of clinical and bedside teaching; teaching at a high academic level; comprehension and appropriate use of the literature; appropriateness of teaching for level of trainees; ability to relate to and appreciate patient needs; being a positive role model; interest in trainees' personal development and well-being; commitment to the evaluation process; encouragement of a team approach; innovative techniques; curriculum development; connecting teaching with problem solving and research | Education and teaching               | Not open to self-nomination           | Public                           |
| Professional Association of Residents of Ontario Resident Teaching Award                    | Resident                               | Two awards for University of Toronto (due to its size) and one for each of the other five Ontario medical schools. Provides outstanding clinical teaching experiences to junior housestaff and clinical clerks.                                                                                                                                                                                                                                                                                                                                                                                                                                                                                                                                                 | Education and teaching               | Faculty-specific nominations          | Public                           |
| Professional Association of Residents of Ontario Lois H Ross Resident Advocate Award        | Staff (non-physician winners excluded) | Any administrator, program coordinator, teacher or clinician who works with residents is eligible for nomination. Criteria: nominee uniquely goes above and beyond their job description to demonstrate a clear passion for resident issues; consistent advocacy on behalf of residents and resident issues; open and responsive to questions and feedback; attentive to resident needs; level of approachability; made a significant improvement in the education, opportunities or wellness of residents; demonstrated proactive approach; creates a positive culture in which the love of medicine can be fostered                                                                                                                                           | Professionalism, advocacy & wellness | Not open to self-nomination           | Public                           |
| Maritime Resident Doctors Excellence in Teaching Award                                      | Staff                                  | Given to a team leader who has exemplified their skills in patient care, teaching and interactions with residents. Criteria: clinical excellence; ability to relate to and appreciate patient needs and concerns; patient communication and education; quality of bedside teaching; laboratory; philosophy; team approach; ability to teach at different levels; effective communication with residents and colleagues; ability to act as a role model; interest in resident's personal development and well-being                                                                                                                                                                                                                                              | Education and teaching               | Nominated by residents                | Part public, part requested data |
| Maritime Resident Doctors Resident Well-Being Award                                         | Resident                               | To recognize residents who make an outstanding contribution to resident well-being. Criteria: Strong team player; respect for peers & patients; dedication; enhances the residency experience for other residents through teaching, support of peers; approachable; role model for balancing work and personal life; other contributions to resident well-being                                                                                                                                                                                                                                                                                                                                                                                                 | Professionalism, advocacy & wellness | Require additional resident nominator | Public, verified by Requested    |

|                                                                                                               |          |                                                                                                                                                                             |                 |                                                                          |                |
|---------------------------------------------------------------------------------------------------------------|----------|-----------------------------------------------------------------------------------------------------------------------------------------------------------------------------|-----------------|--------------------------------------------------------------------------|----------------|
| Professional Association of Residents of Newfoundland and Labrador Dr John G Williams Clinical Teaching Award | Staff    | Exemplary dedication to the important role of teacher to those he or she comes into contact with in a cheerful, positive manner with a high degree of knowledge and skills. | Not classified. | Not open to self-nomination; nominated by residents and medical students | Requested data |
| Professional Association of Residents of Newfoundland and Labrador Lorimer Scholarship                        | Resident | General all-around qualities of congeniality towards staff, patient rapport, bedside manner.                                                                                | Not classified. | Not open to self-nomination                                              | Requested data |
